# Supplementary material
Source: PubMed Central journal article supplement (PMC3380141)
Supplement: NIHMS383017-supplement-1_si_001.pdf [file NIHMS383017-supplement-1_si_001.pdf]

## **Supporting Information**

### **Quantitative Imaging of Ion Transport through Single Nanopores by High-Resolution Scanning Electrochemical Microscopy**

Mei Shen, Ryoichi Ishimatsu, Jiyeon Kim, and Shigeru Amemiya\*

*Department of Chemistry, University of Pittsburgh, 219 Parkman Avenue, Pittsburgh, Pennsylvania,*

*15260*

**Chemicals.** Tetradodecylammonium (TDDA) bromide, tetrabutylammonium chloride (TBACl), 1,2-dichloroethane, potassium chloride, and *N*-dimethyltrimethyl silylamine were purchased from Sigma-Aldrich (Saint Louis, MO). Potassium tetrakis(pentafluorophenyl)borate (TFAB) was obtained from Boulder Scientific Company (Mead, CO). Isopropyl alcohol from J. T. Baker (Phillipsburg, NJ). All reagents were used as received. The TFAB salt of TDDA was prepared by metathesis.<sup>S-1</sup> 10 mM TBACl was dissolved in 18.3 M $\Omega$  cm deionized water (Nanopure, Barnstead, Dubuque, IA) with 0.3 M KCl. The resulting solution was passed through a 0.2  $\mu$ m filter (Fisher Scientific, Hanover Park, IL) before its use for SECM imaging.

**SEM of Nanopipets.** A nanopipet was pulled<sup>S-2</sup> as reported elsewhere and coated with a thin Pd film by a high-resolution sputter coater (Cressington 208HR, Ted Pella, Redding, CA) at a working distance of 4 cm with 20 mA for 5 s. The orifice of a Pd-coated nanopipet was observed by field-emission SEM (model XL-30, Philips Electron Optics, Eindhoven, Netherlands) under 15 kV electron beam.

**Membrane Characterization and Pretreatment.** A pnc-Si membrane (US100-P30Q33, TEMwindows, West Henrietta, NY) was characterized and cleaned as follow. The distribution of pore diameter was determined from the TEM image of a nanomembrane (Figure 1A). The pore diameter is the average of major and minor axes obtained by fitting every pore as an ellipse as reported elsewhere.<sup>S-3</sup> For cleaning, the membrane was soaked in a piranha solution (1:1 volume ratio sulfuric acid: hydrogen peroxide) for 4–6 min, in water for 4–11 min, and then in isopropyl alcohol for 3 min. The cleaned membrane was placed into the electrochemical cell filled with water, which was replaced with 24 ml of 10 mM TBACl in 0.3 M KCl. The position of the membrane was fixed by screwing two glass slides from opposite sides onto the membrane.

**SECM Imaging.** The setup of our SECM system is detailed elsewhere.<sup>S-2</sup> Briefly, a home-built SECM stage was used for tip positioning while the potentiostat of CHI 900 (CH Instruments, Austin, TX) was used for recording the tip current in a two electrode cell with Ag/AgCl and Pt electrodes in outer aqueous and inner organic phases, respectively. The  $x$ ,  $y$ , and  $z$ -positions of a nanopipet tip were roughly controlled using the micrometers (SM-25 for  $z$ -axis and AJS100-1 for  $x$ ,  $y$ -axes, Newport, Irvine, CA) of the SECM stage (M-462, Newport), which is also equipped with piezoelectric positioners with closed-loop capacitive sensors for nanoscale tip positioning. Specifically, a  $z$ -axis positioner, P-621.ZCD, was controlled by E-665CR while two E-625.CR controllers were employed for  $x$ ,  $y$ -axis positioners, P-620.2CD, where all positioners and controllers are from PI (Auburn, MA). A Labview program was written to control the positioners in the drift compensation mode, which eliminates drift in the digital-analog converters on the main board of the controllers. The microscope stage was accommodated in an isothermal chamber,<sup>S-2</sup> which was placed in a faraday cage on a vibration isolation table (63-533, TMC, Peabody, MA).

As far as we imaged the small area of a pnc-Si membrane using a sharp tip with small  $RG$ , there was no significant change in the tip–substrate distance or the tip–substrate contact, which can be caused by their imperfect alignment. As schematically shown in Figure S-1A, we were able to achieve a sufficiently parallel alignment between the substrate surface and the tip surface simply using a bubble level because (i) dimensions of  $280\text{ nm} \times 500\text{ nm}$  for the whole SECM image in Figure 3A are only  $\sim 8$  and  $\sim 15$  times larger than an inner tip diameter of  $34\text{ nm}$  and (ii) the sharp tip has a small  $RG$  value of  $1.4$ . Noticeably, the parallel alignment required for constant-height imaging in this work is very similar to the parallel alignment required for perpendicularly approaching a typical SECM nanotip with a large  $RG$  value of  $\sim 10$  near the substrate surface without contact (Figure S-1B), which was also achieved using a bubble level.<sup>S-4</sup>

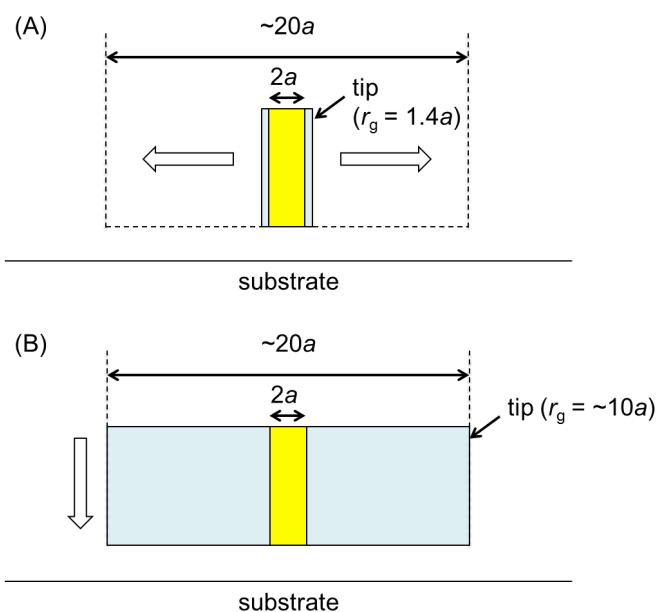

**Figure S-1.** Parallel alignment between the tip surface and the substrate surface required for (A) imaging a small area using a sharp tip with  $RG = 1.4$  and (B) positioning a typical tip with  $RG = \sim 10$  near the substrate surface.

Prior to imaging, the tip was brought in close proximity to a nanopore membrane at  $(x, y) = (0, 0)$  using the feedback mode of SECM, and held at a constant height from the membrane surface. Then, the tip was scanned in  $x$ -direction with a step size of 4 nm in 70 steps, thereby resulting in a travel distance of 280 nm (Figure S-2). After each line scan, the  $x$ -position of the tip was returned to 0 nm and its  $y$  position was shifted by 5 nm, which was followed by the next line scan from  $x = 0$  nm to  $x = 280$  nm. The line scan in  $x$ -direction was repeated from  $y = 0$  nm to  $y = 500$  nm at every 5 nm for 100 steps. Overall, it took  $\sim 12$  minutes (Figure 3B) to obtain the  $280 \text{ nm} \times 500 \text{ nm}$  image with  $71 \times 101$  data points.

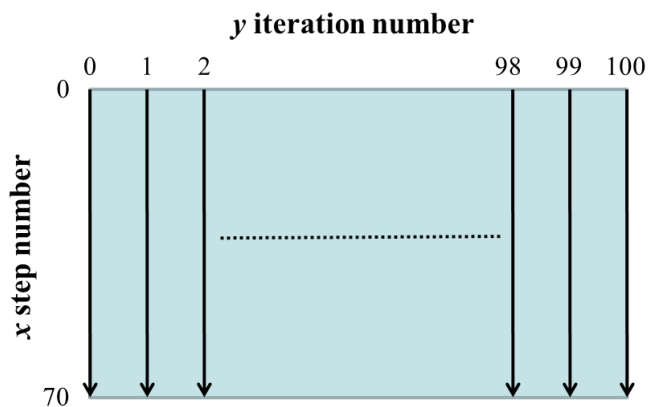

**Figure S-2.** Scheme of lateral scanning directions.

**Finite Element Simulation.** The simulation report generated by COMSOL Multiphysics finite element package (version 3.5a, COMSOL, Inc., Burlington, MA) is attached. In this simulation, an SECM diffusion problem with a disk-shaped tip over a nanopore as an elliptic cylinder is defined in Cartesian coordinates (Figure S-3). The origin of the coordinate axes is set at the center of the upper orifice of the nanopore. Initially, the solution phase contains a target ion at a bulk concentration of  $c^*$ . The diffusion of the target ion in the solution phase is defined by

$$\frac{\partial c}{\partial t} = D \left( \frac{\partial^2 c}{\partial x^2} + \frac{\partial^2 c}{\partial y^2} + \frac{\partial^2 c}{\partial z^2} \right) \quad (\text{S-1})$$

where  $c$  is the ion concentration at  $(x, y, z)$ . Ion diffusion in the inner organic solution does not affect the tip current, which is limited by the diffusion of the target ion in the outer aqueous solution. Accordingly, the zero ion concentration is used as the electrode surface boundary condition (red lines in Figure S-3). The membrane surface and pore wall are impermeable to an ion, which corresponds to zero flux perpendicular to these boundaries (black bold lines). Boundary conditions at simulation space limits are given by the bulk concentration of the ion,  $c^*$  (blue lines). The simulation space is large enough to affect the simulated tip current less than 1.5 %.

Specifically, eq S-1 was solved using the approximate size of a nanopore, which is smaller by the tip diameter than the corresponding size in an SECM image (see main text). Then, pore size in the simulation was adjusted until experimental line scans in the image fit with simulation results (Figure 4A).

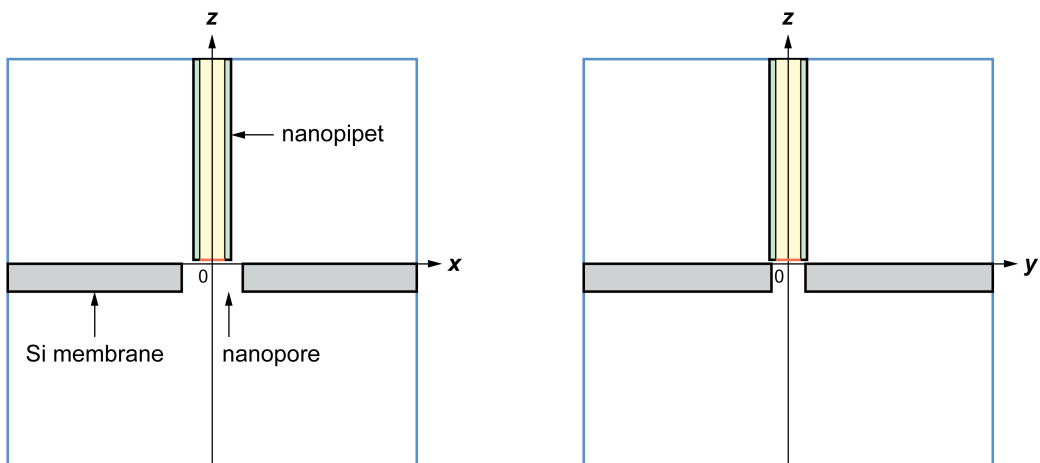

**Figure S-3.** Scheme of cross sections of simulation space at  $y = 0$  (left) and  $x = 0$  (right).

**Effect of Pore Depth on Tip Current.** The  $x$ -line scans over pore 7 at  $\Delta y = 0$  were simulated using different pore depths (Figure S-4) to confirm its unique depth of 30 nm.

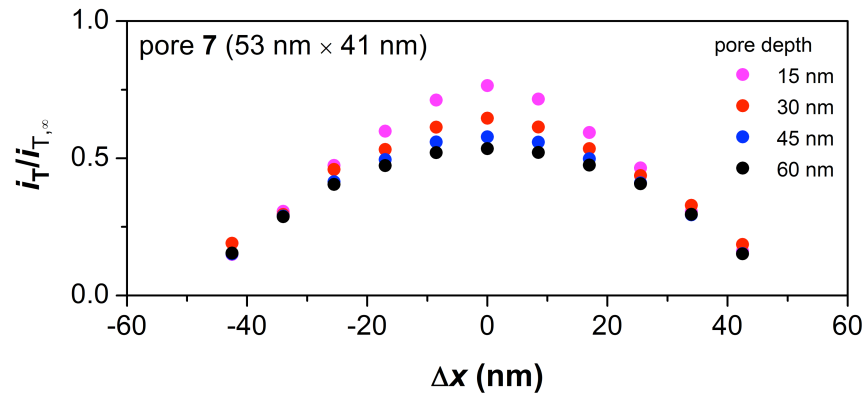

**Figure S-4.** Effect of pore depth on simulated current responses in  $x$ -line scans over pore 7 at  $\Delta y = 0$  nm.

See the legend of Figure 4 for other parameters.

## REFERENCES

- (S-1) Guo, J.; Amemiya, S. *Anal. Chem.* **2006**, *78*, 6893.
- (S-2) Kim, J.; Shen, M.; Nioradze, N.; Amemiya, S. *Anal. Chem.* **2012**, *84*, 3489.
- (S-3) Kim, E.; Xiong, H.; Striemer, C. C.; Fang, D. Z.; Fauchet, P. M.; McGrath, J. L.; Amemiya, S. *J. Am. Chem. Soc.* **2008**, *130*, 4230.
- (S-4) Sun, P.; Mirkin, M. V. *Anal. Chem.* **2006**, *78*, 6526.



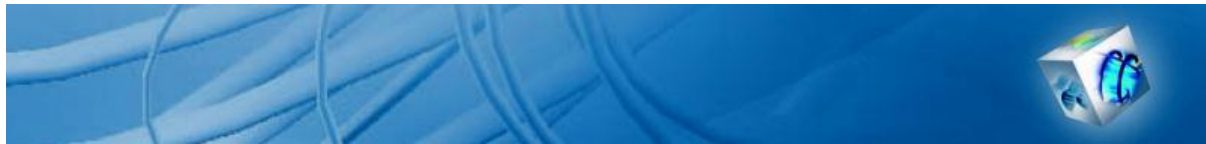

# COMSOL Model Report

## 1. Table of Contents

- Title - COMSOL Model Report
- Table of Contents
- Model Properties
- Geometry
- Geom1
- Geom2
- Geom3
- Geom4
- Geom5
- Solver Settings
- Postprocessing
- Variables

## 2. Model Properties

| Property       | Value                    |
|----------------|--------------------------|
| Model name     |                          |
| Author         |                          |
| Company        |                          |
| Department     |                          |
| Reference      |                          |
| URL            |                          |
| Saved date     | May 15, 2012 11:20:33 AM |
| Creation date  | Jan 30, 2010 5:51:36 PM  |
| COMSOL version | COMSOL 3.5.0.603         |

Application modes and modules used in this model:

- Geom1 (2D)
- Geom2 (2D)
- Geom3 (2D)
- Geom4 (2D)
- Geom5 (3D)
  - Diffusion (Chemical Engineering Module)

# 3. Geometry

Number of geometries: 5

## 3.1. Geom1

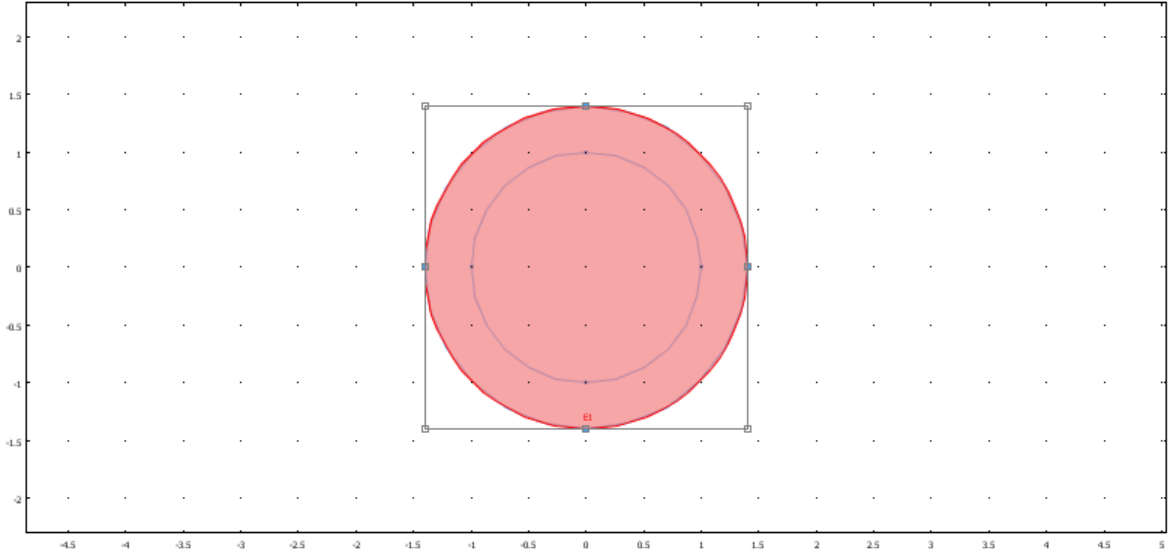

# 3.2. Geom2

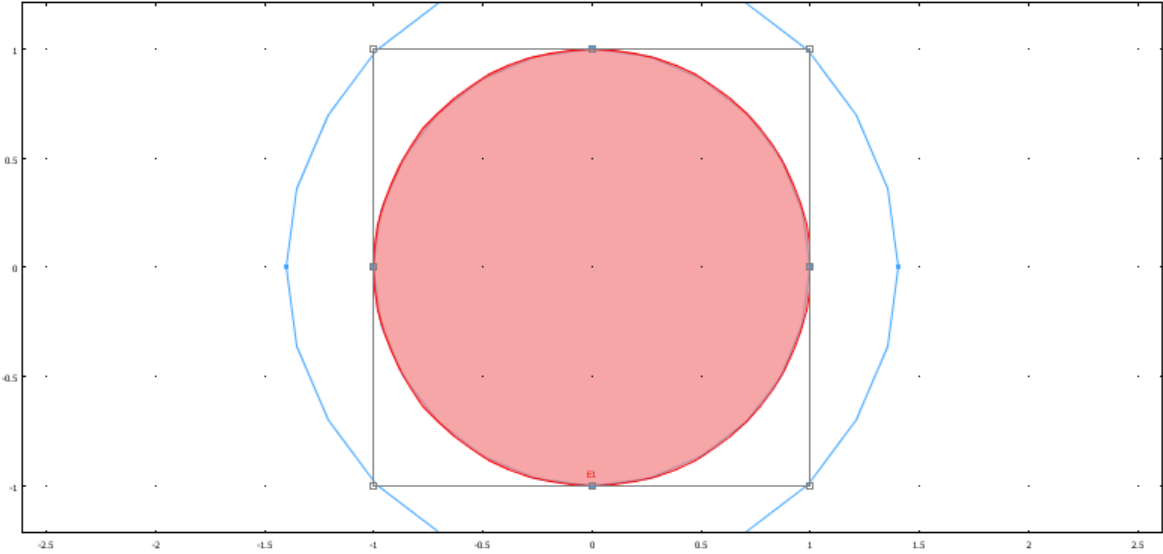

### 3.3. Geom3

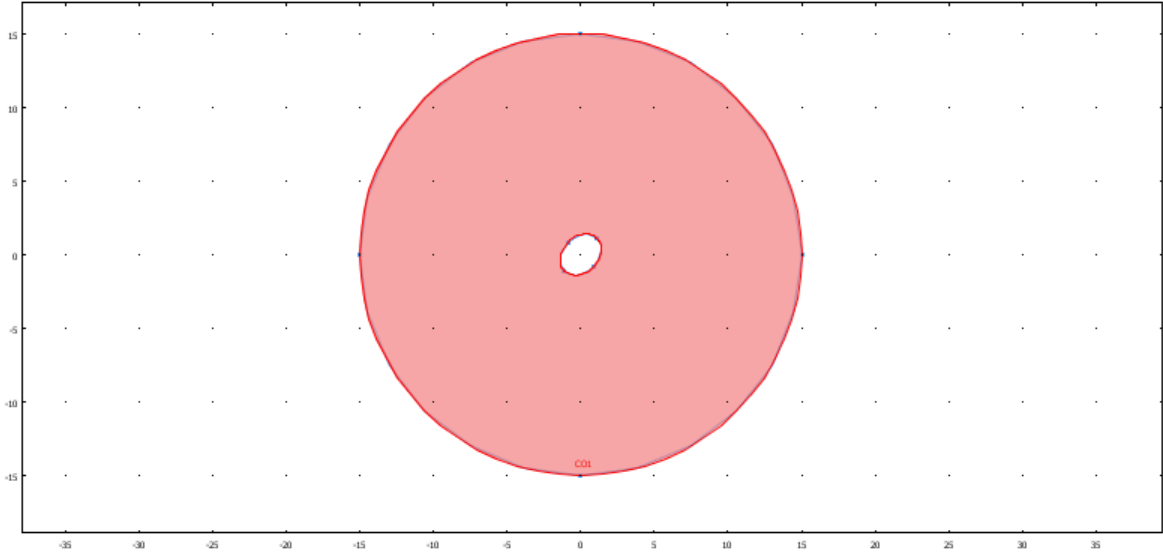

# 3.4. Geom4

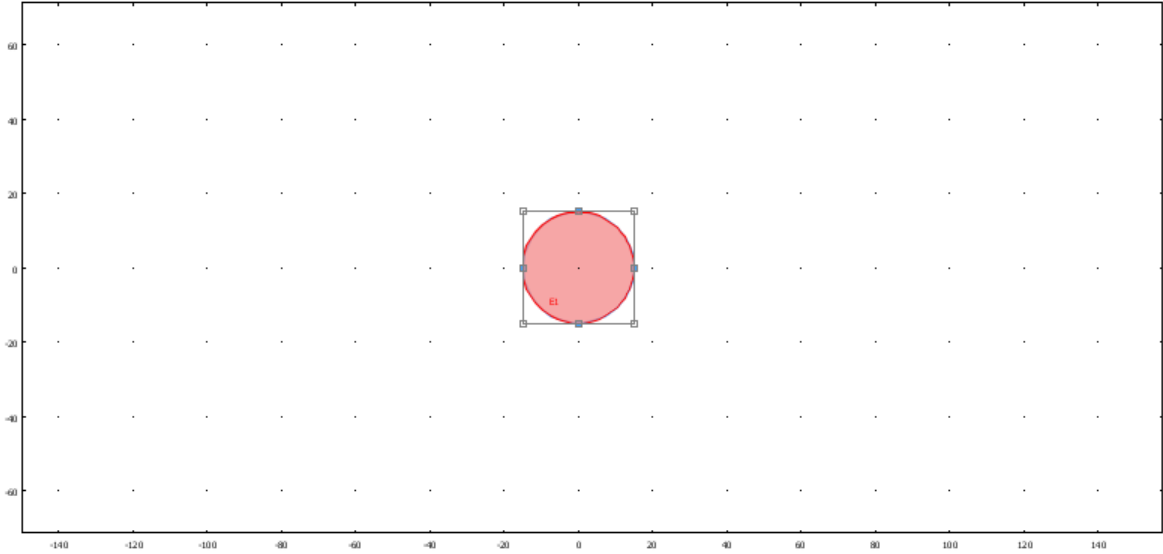

# 3.5. Geom5

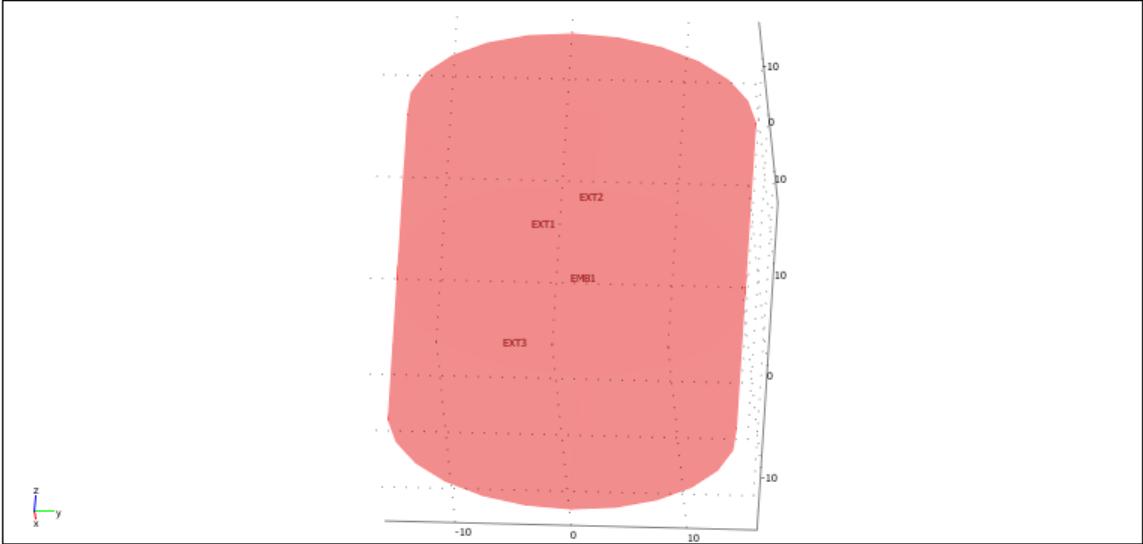

### 3.5.1. Point mode

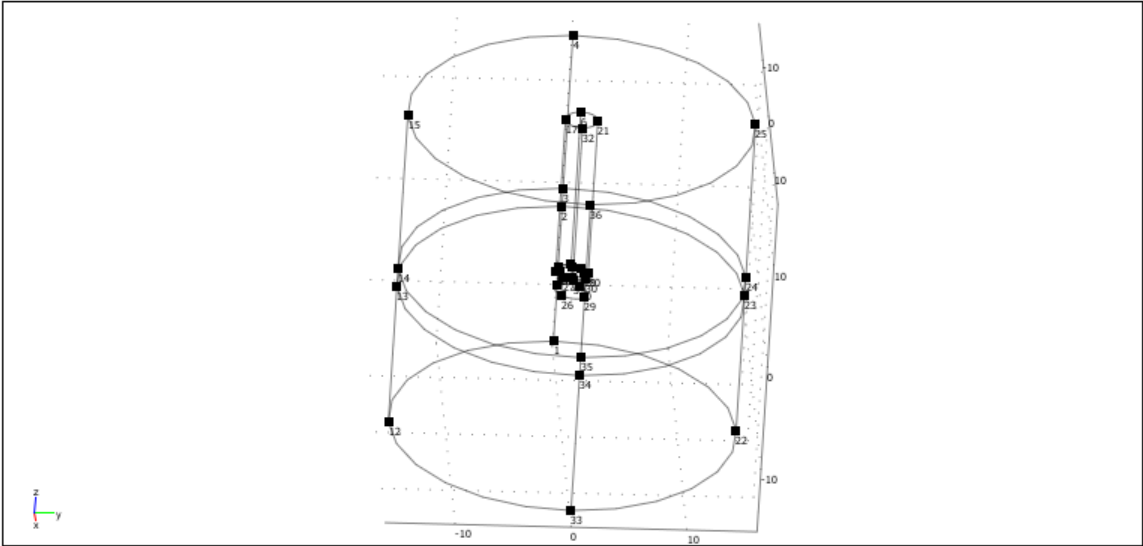

### 3.5.2. Edge mode

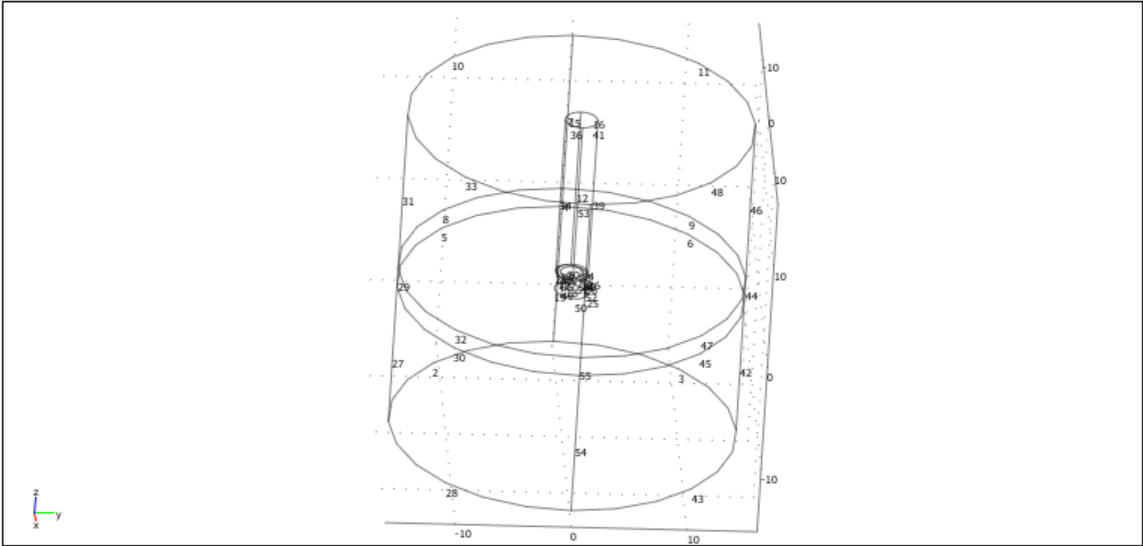



### 3.5.3. Boundary mode

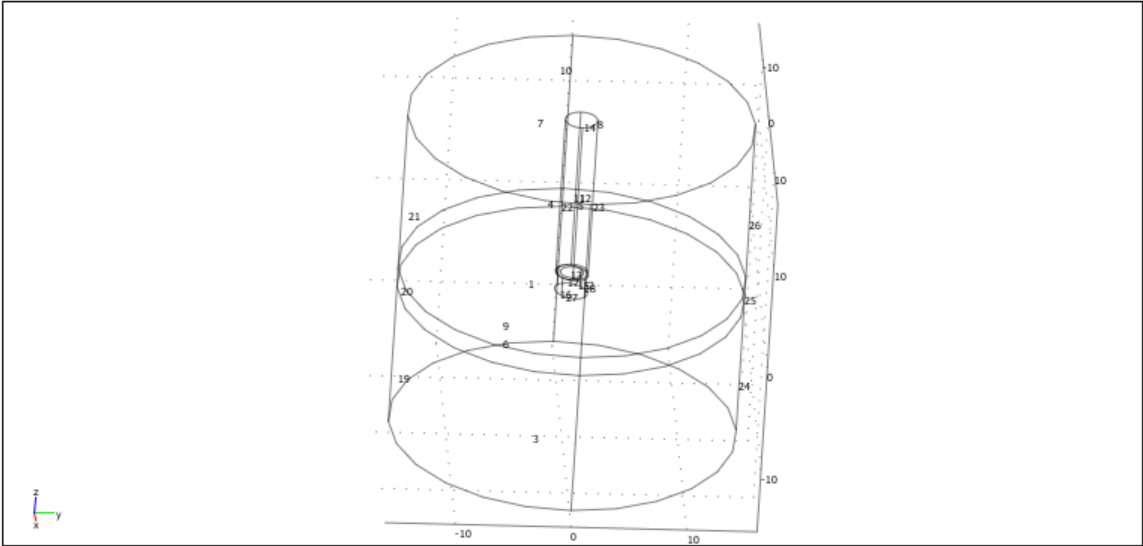

### 3.5.4. Subdomain mode

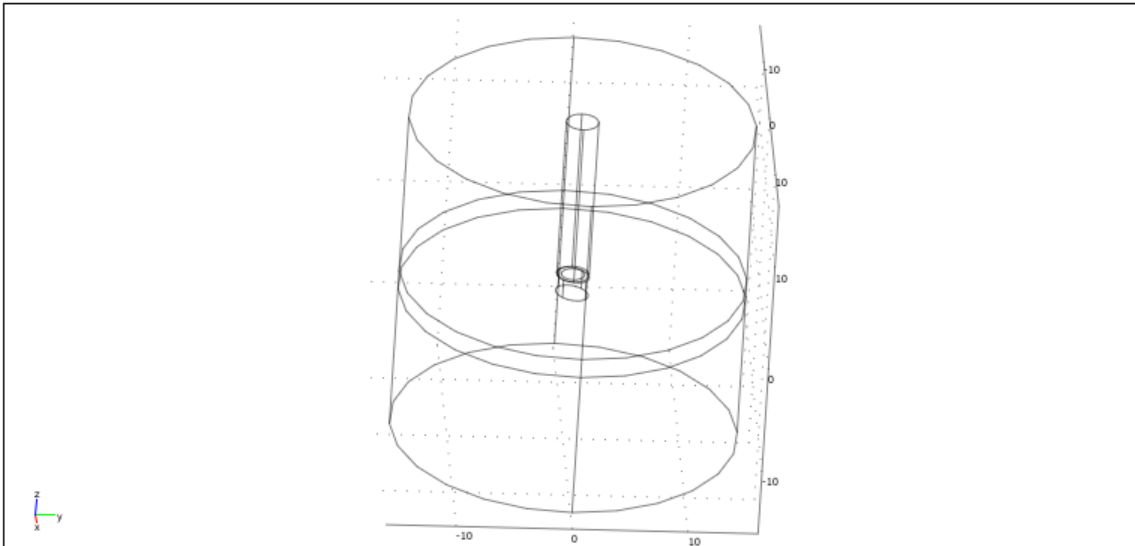

## 4. Geom1

Space dimensions: 2D

Independent variables: x, y, z

## 5. Geom2

Space dimensions: 2D

Independent variables: x, y, z

## 6. Geom3

Space dimensions: 2D

Independent variables: x, y, z

## **7. Geom4**

Space dimensions: 2D

Independent variables:  $x, y, z$

## **8. Geom5**

Space dimensions: 3D

Independent variables:  $x, y, z$

## 8.1. Mesh

### 8.1.1. Mesh Statistics

|                              |        |
|------------------------------|--------|
| Number of degrees of freedom | 250495 |
| Number of mesh points        | 54195  |
| Number of elements           | 318297 |
| Tetrahedral                  | 318297 |
| Prism                        | 0      |
| Hexahedral                   | 0      |
| Number of boundary elements  | 27502  |
| Triangular                   | 27502  |
| Quadrilateral                | 0      |
| Number of edge elements      | 1660   |
| Number of vertex elements    | 36     |
| Minimum element quality      | 0.299  |
| Element volume ratio         | 0      |

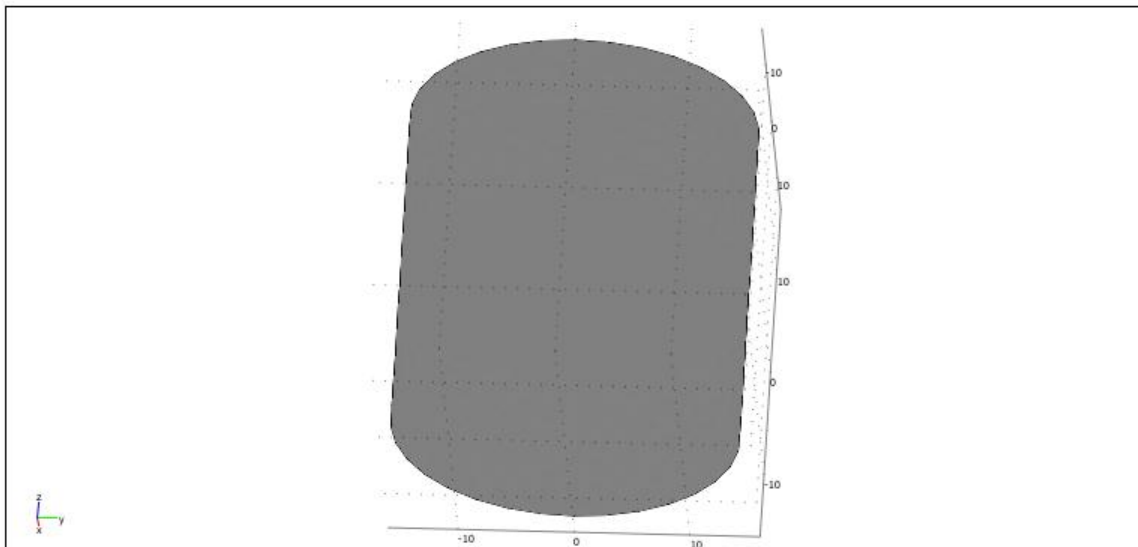

## 8.2. Application Mode: Diffusion (chdi)

Application mode type: Diffusion (Chemical Engineering Module)

Application mode name: chdi

### 8.2.1. Application Mode Properties

| Property               | Value                |
|------------------------|----------------------|
| Default element type   | Lagrange - Quadratic |
| Analysis type          | Stationary           |
| Equilibrium assumption | Off                  |
| Frame                  | Frame (xyz)          |
| Weak constraints       | Off                  |
| Constraint type        | Ideal                |

### 8.2.2. Variables

Dependent variables: c

Shape functions: shlag(2,'c')

Interior boundaries not active

### 8.2.3. Boundary Settings

|                    |                    |                              |                                   |               |
|--------------------|--------------------|------------------------------|-----------------------------------|---------------|
| Boundary           |                    | 1-3, 7-8, 10, 19, 21, 24, 26 | 6, 9, 11-13, 15-16, 18, 22-23, 27 | 17            |
| Type               |                    | Concentration                | Insulation/Symmetry               | Concentration |
| Concentration (c0) | mol/m <sup>3</sup> | 1                            | 0                                 | 0             |

### 8.2.4. Subdomain Settings

The subdomain settings only contain default values.

|                         |                    |   |
|-------------------------|--------------------|---|
| Subdomain initial value |                    | 1 |
| Concentration, c (c)    | mol/m <sup>3</sup> | 1 |

## 9. Solver Settings

Solve using a script: off

|                          |            |
|--------------------------|------------|
| Analysis type            | Stationary |
| Auto select solver       | On         |
| Solver                   | Stationary |
| Solution form            | Automatic  |
| Symmetric                | auto       |
| Adaptive mesh refinement | Off        |
| Optimization/Sensitivity | Off        |
| Plot while solving       | Off        |

### 9.1. Direct (UMFPACK)

Solver type: Linear system solver

| Parameter                | Value |
|--------------------------|-------|
| Pivot threshold          | 0.1   |
| Memory allocation factor | 0.7   |

### 9.2. Stationary

| Parameter                           | Value     |
|-------------------------------------|-----------|
| Linearity                           | Automatic |
| Relative tolerance                  | 1.0E-6    |
| Maximum number of iterations        | 25        |
| Manual tuning of damping parameters | Off       |
| Highly nonlinear problem            | Off       |
| Initial damping factor              | 1.0       |
| Minimum damping factor              | 1.0E-4    |
| Restriction for step size update    | 10.0      |

### 9.3. Advanced

| Parameter                     | Value       |
|-------------------------------|-------------|
| Constraint handling method    | Elimination |
| Null-space function           | Automatic   |
| Automatic assembly block size | On          |
| Assembly block size           | 1000        |

|                                                                        |           |
|------------------------------------------------------------------------|-----------|
| Use Hermitian transpose of constraint matrix and in symmetry detection | Off       |
| Use complex functions with real input                                  | Off       |
| Stop if error due to undefined operation                               | On        |
| Store solution on file                                                 | Off       |
| Type of scaling                                                        | Automatic |
| Manual scaling                                                         |           |
| Row equilibration                                                      | On        |
| Manual control of reassembly                                           | Off       |
| Load constant                                                          | On        |
| Constraint constant                                                    | On        |
| Mass constant                                                          | On        |
| Damping (mass) constant                                                | On        |
| Jacobian constant                                                      | On        |
| Constraint Jacobian constant                                           | On        |

## 10. Postprocessing

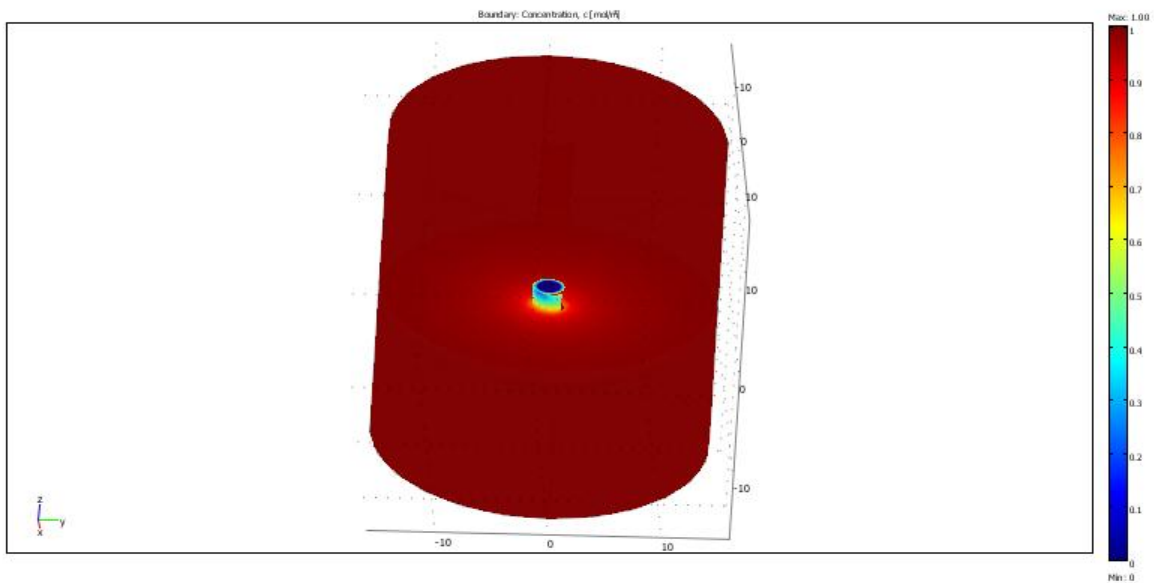

## 11. Variables

### 11.1. Boundary

#### 11.1.1. Boundary 1-3, 6-13, 15-19, 21-24, 26-27

| Name          | Description              | Unit                    | Expression                                                                                   |
|---------------|--------------------------|-------------------------|----------------------------------------------------------------------------------------------|
| ndflux_c_chdi | Normal diffusive flux, c | mol/(m <sup>2</sup> *s) | $nx\_chdi * dflux\_c\_x\_chdi + ny\_chdi * dflux\_c\_y\_chdi + nz\_chdi * dflux\_c\_z\_chdi$ |

#### 11.1.2. Boundary 4-5, 14, 20, 25

| Name          | Description              | Unit                    | Expression |
|---------------|--------------------------|-------------------------|------------|
| ndflux_c_chdi | Normal diffusive flux, c | mol/(m <sup>2</sup> *s) |            |

### 11.2. Subdomain

#### 11.2.1. Subdomain 1

| Name           | Description                            | Unit                    | Expression                                                   |
|----------------|----------------------------------------|-------------------------|--------------------------------------------------------------|
| grad_c_x_chdi  | Concentration gradient, c, x component | mol/m <sup>4</sup>      | cx                                                           |
| dflux_c_x_chdi | Diffusive flux, c, x component         | mol/(m <sup>2</sup> *s) | $-Dxx\_c\_chdi * cx - Dxy\_c\_chdi * cy - Dxz\_c\_chdi * cz$ |
| grad_c_y_chdi  | Concentration gradient, c, y component | mol/m <sup>4</sup>      | cy                                                           |
| dflux_c_y_chdi | Diffusive flux, c, y component         | mol/(m <sup>2</sup> *s) | $-Dyx\_c\_chdi * cx - Dyy\_c\_chdi * cy - Dyz\_c\_chdi * cz$ |
| grad_c_z_chdi  | Concentration gradient, c, z component | mol/m <sup>4</sup>      | cz                                                           |
| dflux_c_z_chdi | Diffusive flux, c, z component         | mol/(m <sup>2</sup> *s) | $-Dzx\_c\_chdi * cx - Dzy\_c\_chdi * cy - Dzz\_c\_chdi * cz$ |



|              |                           |                         |                                                                                               |
|--------------|---------------------------|-------------------------|-----------------------------------------------------------------------------------------------|
| grad_c_chdi  | Concentration gradient, c | mol/m <sup>4</sup>      | $\sqrt{\text{grad\_c\_x\_chdi}^2 + \text{grad\_c\_y\_chdi}^2 + \text{grad\_c\_z\_chdi}^2}$    |
| dflux_c_chdi | Diffusive flux, c         | mol/(m <sup>2</sup> *s) | $\sqrt{\text{dflux\_c\_x\_chdi}^2 + \text{dflux\_c\_y\_chdi}^2 + \text{dflux\_c\_z\_chdi}^2}$ |

### 11.2.2. Subdomain 2-3

| Name           | Description                            | Unit                    | Expression |
|----------------|----------------------------------------|-------------------------|------------|
| grad_c_x_chdi  | Concentration gradient, c, x component | mol/m <sup>4</sup>      |            |
| dflux_c_x_chdi | Diffusive flux, c, x component         | mol/(m <sup>2</sup> *s) |            |
| grad_c_y_chdi  | Concentration gradient, c, y component | mol/m <sup>4</sup>      |            |
| dflux_c_y_chdi | Diffusive flux, c, y component         | mol/(m <sup>2</sup> *s) |            |
| grad_c_z_chdi  | Concentration gradient, c, z component | mol/m <sup>4</sup>      |            |
| dflux_c_z_chdi | Diffusive flux, c, z component         | mol/(m <sup>2</sup> *s) |            |
| grad_c_chdi    | Concentration gradient, c              | mol/m <sup>4</sup>      |            |
| dflux_c_chdi   | Diffusive flux, c                      | mol/(m <sup>2</sup> *s) |            |
